# Supplementary material for: Impact of COVID-19 on frontline pharmacists’ roles and services in Canada: The INSPIRE Survey
Source: PubMed Central journal article supplement — Can Pharm J (Ott). 2021 Jul 9;154(6):368–73. doi: 10.1177/17151635211028253 (PMC8581810; doi:10.1177/17151635211028253), 2021-07-09
Supplement: sj-pdf-1-cph-10.1177_17151635211028253.pdf [file sj-pdf-1-cph-10.1177_17151635211028253.pdf]

## APPENDIX 1 Participant demographics

|                                                                                                                                                                                                                | Number of Participants | Percentage (%) |
|----------------------------------------------------------------------------------------------------------------------------------------------------------------------------------------------------------------|------------------------|----------------|
| <b>Practice Jurisdiction, n=710</b>                                                                                                                                                                            |                        |                |
| Alberta                                                                                                                                                                                                        | 150                    | 21.1%          |
| British Columbia                                                                                                                                                                                               | 31                     | 4.4%           |
| Manitoba                                                                                                                                                                                                       | 3                      | 0.4%           |
| New Brunswick                                                                                                                                                                                                  | 14                     | 2.0%           |
| Newfoundland and Labrador                                                                                                                                                                                      | 20                     | 2.8%           |
| Nova Scotia                                                                                                                                                                                                    | 47                     | 6.6%           |
| Ontario                                                                                                                                                                                                        | 376                    | 53%            |
| Prince Edward Island                                                                                                                                                                                           | 5                      | 0.7%           |
| Quebec                                                                                                                                                                                                         | 48                     | 6.8%           |
| Saskatchewan                                                                                                                                                                                                   | 15                     | 2.1%           |
| Nunavut                                                                                                                                                                                                        | 1                      | 0.1%           |
| <b>Pharmacist's practice setting, n=706</b>                                                                                                                                                                    |                        |                |
| Community Pharmacy<br>(e.g., independent, chain, franchise)                                                                                                                                                    | 514                    | 72.7%          |
| Team-based Community Practice<br>(e.g., primary care network, family health team)                                                                                                                              | 27                     | 3.8            |
| Acute Care/Inpatient Care (e.g., hospital)                                                                                                                                                                     | 71                     | 10.1           |
| Ambulatory/Outpatient Clinic (e.g., specialty clinics)                                                                                                                                                         | 22                     | 3.1            |
| Continuing or long-Term Care                                                                                                                                                                                   | 5                      | 0.7            |
| Worked across multiple different practice settings                                                                                                                                                             | 62                     | 8.8            |
| Others                                                                                                                                                                                                         | 5                      | 1.8%           |
| <ul style="list-style-type: none"> <li>• virtual pharmacy / MedsCheck</li> <li>• COVID-19 isolation shelter</li> <li>• Home care</li> <li>• Telepharmacy</li> <li>• Online Weight-Management Clinic</li> </ul> |                        |                |

Lee DH, et al. Impact of COVID-19 on frontline pharmacists' roles and services in Canada: the INSPIRE Survey. *Can Pharm J (Ott)* 2021;154. DOI: 10.1177/17151635211028253.
