# Supplementary material for: Impact of COVID-19 on frontline pharmacists’ roles and services in Canada: The INSPIRE Survey
Source: PubMed Central journal article supplement — Can Pharm J (Ott). 2021 Jul 9;154(6):368–73. doi: 10.1177/17151635211028253 (PMC8581810; doi:10.1177/17151635211028253), 2021-07-09
Supplement: sj-pdf-2-cph-10.1177_17151635211028253.pdf [file sj-pdf-2-cph-10.1177_17151635211028253.pdf]

## APPENDIX 2 Survey Questions

1. Do you provide informed consent to participate in the research study?
    - a. Yes
    - b. No
  
  2. Have you provided patient care during COVID-19 pandemic in any practice setting?
    - a. Yes
    - b. No
- 

### Demographics and Practice Characteristics

1. In which jurisdictions have you practiced during COVID-19 pandemic? Select all that apply.
  - a) Alberta
  - b) British Columbia
  - c) Manitoba
  - d) New Brunswick
  - e) Newfoundland and Labrador
  - f) Nova Scotia
  - g) Ontario
  - h) Prince Edward Island
  - i) Quebec
  - j) Saskatchewan
  - k) Northwest Territories
  - l) Nunavut
  - m) Yukon
  
2. In which practice setting(s) have you provided direct patient care during COVID-19 pandemic? Select all that apply.
  - a) Community Pharmacy- Franchise or Chain (e.g., Safeway, Sobeys, Shoppers Drug Mart)
  - b) Community Pharmacy- Independent
  - c) Team-based Community Practice (e.g., primary care network, family health team)
  - d) Acute Care/Inpatient Care (eg. hospital)
  - e) Ambulatory/Outpatient Clinic (e.g., specialty clinics)
  - f) Continuing or long-Term Care
  - g) Other (please specify) (e.g., virtual pharmacy)

3. Please indicate how often you have undertaken each of the following roles during COVID-19

|                                                                                                                                             | Never | Rarely | Sometimes | Often | Always | N/A |
|---------------------------------------------------------------------------------------------------------------------------------------------|-------|--------|-----------|-------|--------|-----|
| Handling logistics of obtaining medication supplies (e.g., identifying work arounds for drug shortages, coordinating with other pharmacies) |       |        |           |       |        |     |
| Establishing remote pharmacy services (e.g., medication delivery system, telehealth)                                                        |       |        |           |       |        |     |
| Screening for COVID-19 symptoms                                                                                                             |       |        |           |       |        |     |
| Renewing/extending a prescription for continuity of care for chronic diseases                                                               |       |        |           |       |        |     |
| Providing independent prescribing                                                                                                           |       |        |           |       |        |     |
| Administering vaccinations (e.g., influenza vaccines)                                                                                       |       |        |           |       |        |     |
| Providing emergency supply refills during COVID-19 (e.g., 30 days supply)                                                                   |       |        |           |       |        |     |
| Rationing limited supplies of medications (e.g. limiting dispensing to 30 days supply only)                                                 |       |        |           |       |        |     |
| Treating ambulatory conditions (e.g. mild constipation, skin rash)                                                                          |       |        |           |       |        |     |
| Providing expertise or guidance to other health care providers on COVID-19 treatments                                                       |       |        |           |       |        |     |
| Providing expertise or guidance to community members on COVID-19 treatments                                                                 |       |        |           |       |        |     |
| Following up on patient's medication safety and efficacy when being actively treated with proposed COVID-19 treatments                      |       |        |           |       |        |     |
| Providing Psychological First Aid (e.g., allaying patients fears for COVID-19, identifying patients at risk of mental health crises)        |       |        |           |       |        |     |
| Educating the public on reducing the spread of COVID-19 (e.g., handwashing, social-distancing)                                              |       |        |           |       |        |     |

4. Please rate your level of agreement with the following statements

| Statements                                                                                                            | Strongly disagree | Disagree | Neutral | Agree | Strongly agree | N/A |
|-----------------------------------------------------------------------------------------------------------------------|-------------------|----------|---------|-------|----------------|-----|
| The COVID-19 pandemic significantly affected my place of work (e.g., pharmacy)                                        |                   |          |         |       |                |     |
| The COVID-19 pandemic significantly affected the way I practice                                                       |                   |          |         |       |                |     |
| The COVID-19 pandemic significantly increased my stress level                                                         |                   |          |         |       |                |     |
| The COVID-19 pandemic significantly increased my concern for safety (e.g., self and others)                           |                   |          |         |       |                |     |
| Patients came to my pharmacy as they did not want to risk going to other health care providers and/or emergency rooms |                   |          |         |       |                |     |
| Community members are coming to my pharmacy for COVID-19 information                                                  |                   |          |         |       |                |     |
| Community members are coming to my pharmacy for me to calm their fears and anxiety regarding the COVID-19 pandemic    |                   |          |         |       |                |     |

5. How do you obtain your information about COVID-19? Select all that apply.

- a. World Health Organization website
- b. Government websites (e.g. Health Canada, provincial health ministry websites)
- c. Pharmacy college websites (e.g. Alberta College of Pharmacists, College of Pharmacists of British Columbia)
- d. Newsletters (e.g. Canadian Pharmacist Association)
- e. Webinars (e.g. Canadian Society of Hospital Pharmacist)
- f. Internet (e.g. Google)
- g. Social media platform (e.g. Twitter)
- h. TV
- i. Radio
- j. Primary literature/Prints/textbooks
- k. Word of mouth
- l. Others (please specify): \_\_\_\_\_

6. How do you and your pharmacy communicate information to your community (e.g. community members, patients, other health care providers, etc.) about COVID-19? Select all that apply.
- a. In-person
  - b. Phone call
  - c. Texting
  - d. Email
  - e. Fax
  - f. Video/conference meetings
  - g. Social media platform
  - h. Others (please specify):\_\_\_\_\_
7. Do you engage with the local disaster and public health agencies to coordinate your pharmacy's response?
- a. Yes
  - b. No
8. Did any of the following challenges **significantly** impact your practice and/or your pharmacy? Select all that apply.
- a. Lack of personal-protective equipment (e.g. face masks, gloves)
  - b. Decreased supply of medications (e.g. medication shortage)
  - c. General supply shortage (e.g. hand sanitizer)
  - d. Inadequate staffing
  - e. Lack of time for clinical counseling (e.g. care plan activities)
  - f. HR-related issues (e.g. vacation time/ paid time off, sick/personal leave, scheduling flexibility, threat of repercussions for missing work, hazard pay)
  - g. Inadequate time for breaks/meals
  - h. Lack of priority access to COVID-19 testing
  - i. Prescription surge (e.g. patient stockpiling)
  - j. Unfair patient expectations (e.g., feeling frustrated with delay in services)
  - k. Insurance issues (e.g. copay)
  - l. Discomfort with temporary expanded practice scope (e.g. extending opioids for continuity of care)

Lee DH, et al. Impact of COVID-19 on frontline pharmacists' roles and services in Canada: the INSPIRE Survey. Can Pharm J (Ott) 2021;154. DOI: 10.1177/17151635211028253.
